# Supplementary material for: TAO-DFT fictitious temperature made simple
Source: Royal Society of Chemistry journal article supplement (doi:10.1039/d2ra01632j), 2022-01-01
Supplement: d2ra01632j1.pdf [file d2ra01632j1.pdf]

## Supplementary information to: TAO-DFT fictitious temperature made simple

Bo-Jyun Chen<sup>1</sup> and Jeng-Da Chai<sup>1,2,3,\*</sup>

<sup>1</sup>*Department of Physics, National Taiwan University, Taipei 10617, Taiwan*

<sup>2</sup>*Center for Theoretical Physics and Center for Quantum Science and Engineering,  
National Taiwan University, Taipei 10617, Taiwan*

<sup>3</sup>*Physics Division, National Center for Theoretical Sciences, Taipei 10617, Taiwan*

---

\* Author to whom correspondence should be addressed. Electronic mail: [jdchai@phys.ntu.edu.tw](mailto:jdchai@phys.ntu.edu.tw)

- 
- [1] J. B. Birks, *Photophysics of Aromatic Molecules*, Wiley, London, 1970.
  - [2] J. Schiedt and R. Weinkauff, *Chem. Phys. Lett.*, 1997, **266**, 201.
  - [3] N. Sabbatini, M. T. Indelli, M. T. Gandolfi, and V. Balzani, *J. Phys. Chem.*, 1982, **86**, 3585.
  - [4] J. Burgos, M. Pope, Ch. E. Swenberg, and R. R. Alfano, *Phys. Status Solidi B*, 1977, **83**, 249.
  - [5] J. B. Schriber, K. P. Hannon, C. Li, and F. A. Evangelista, *J. Chem. Theory Comput.*, 2018, **14**, 6295–6305.
  - [6] S. Arulmozhiraja and T. Ohno, *J. Chem. Phys.*, 2008, **128**, 114301.
  - [7] G. V. Baryshnikov, R. R. Valiev, A. V. Kuklin, D. Sundholm, and H. Ågren, *J. Phys. Chem. Lett.*, 2019, **10**, 6701–6705.

## FIGURES

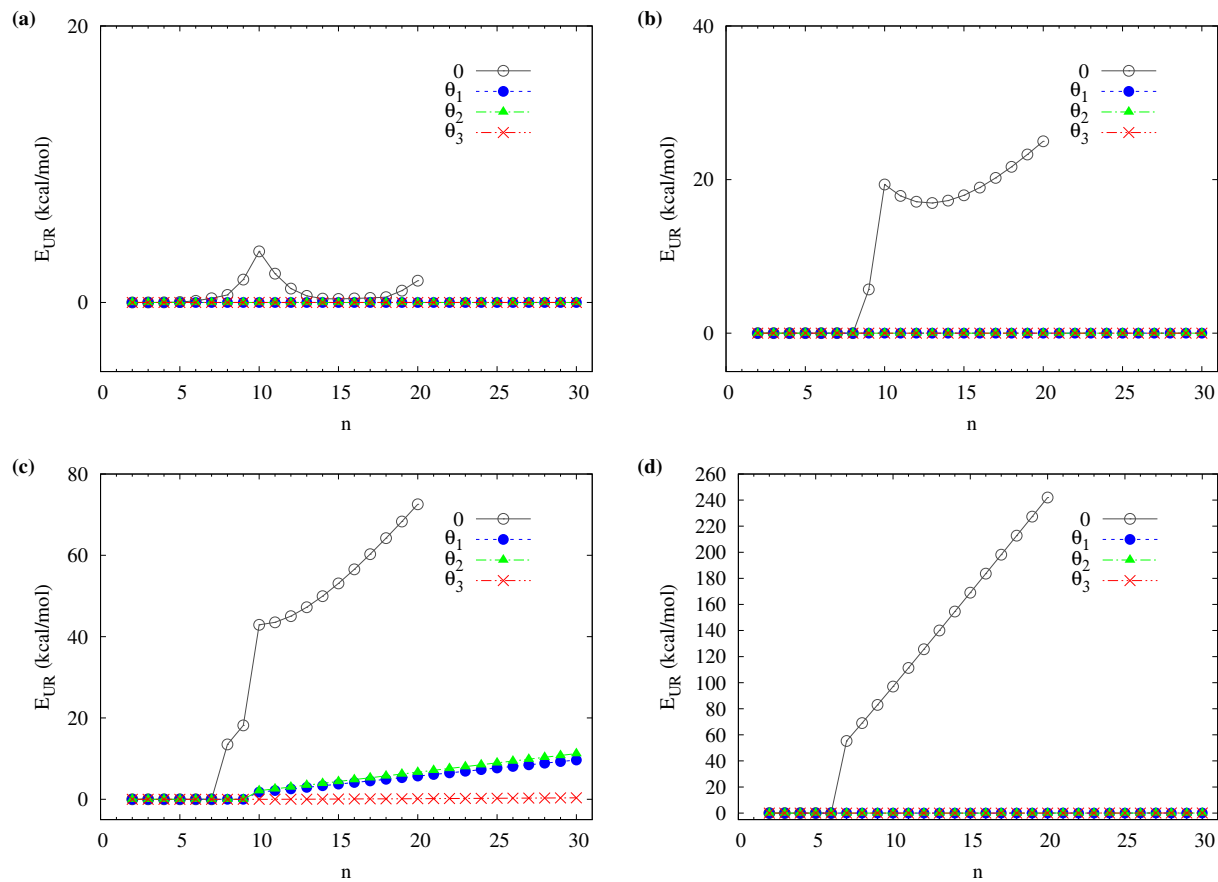

FIG. S1. The difference ( $E_{UR} = E_{RS} - E_{US}$ ) between the lowest spin-unrestricted singlet energy  $E_{US}$  and lowest spin-restricted singlet energy  $E_{RS}$  of  $n$ -acene (with  $n = 2-30$ ), calculated using (a) TAO-LDA, (b) TAO-LDAh25, (c) TAO-LDAh50, and (d) TAO-LDAh100 with the corresponding  $\theta_1$ ,  $\theta_2$ , and  $\theta_3$  values (see Table I). The  $\theta = 0$  results are those obtained with (a) KS-LDA, (b) KS-LDAh25, (c) KS-LDAh50, and (d) KS-LDAh100, respectively.

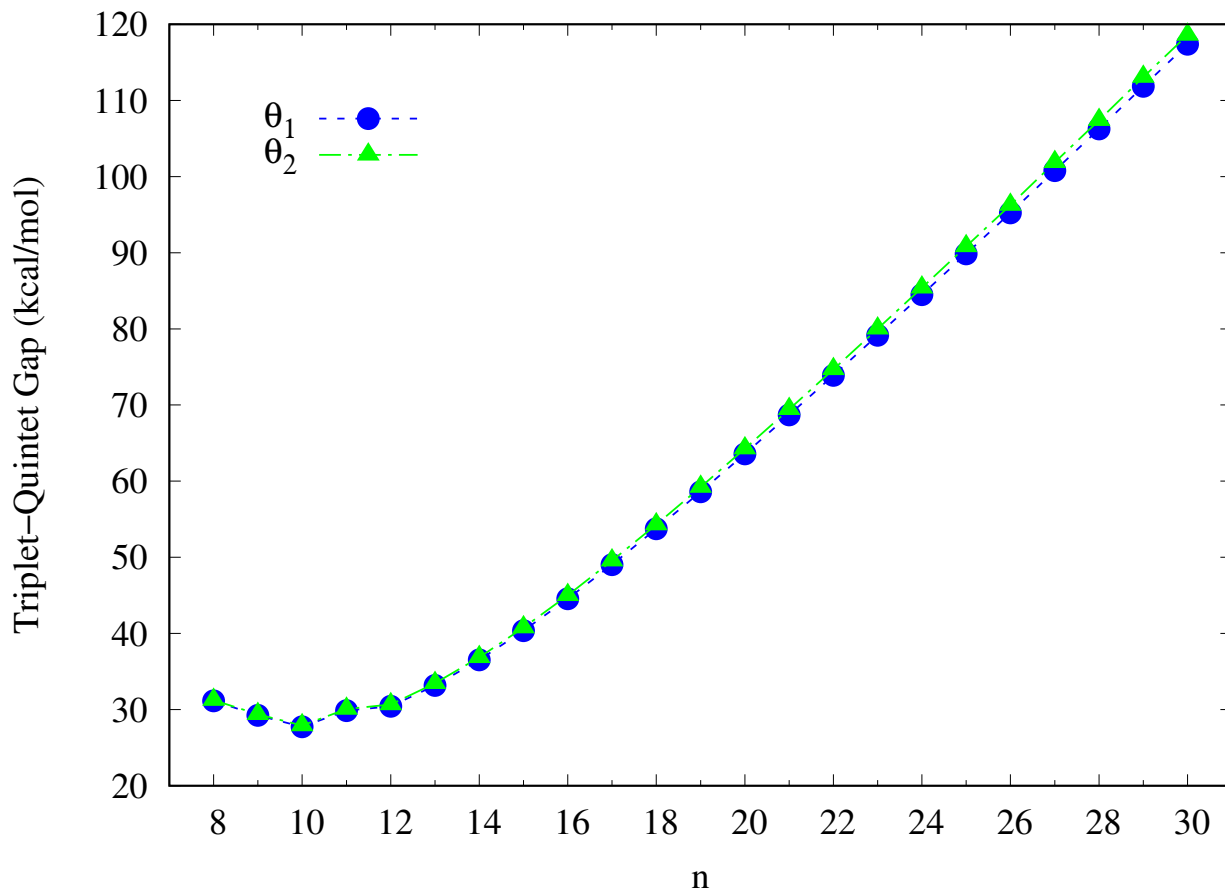

FIG. S2. Triplet-quintet gap of  $n$ -acene (with  $n = 8$ – $30$ ), calculated using spin-unrestricted TAO-LDAh100 with the corresponding  $\theta_1$  and  $\theta_2$  values (see Table I).

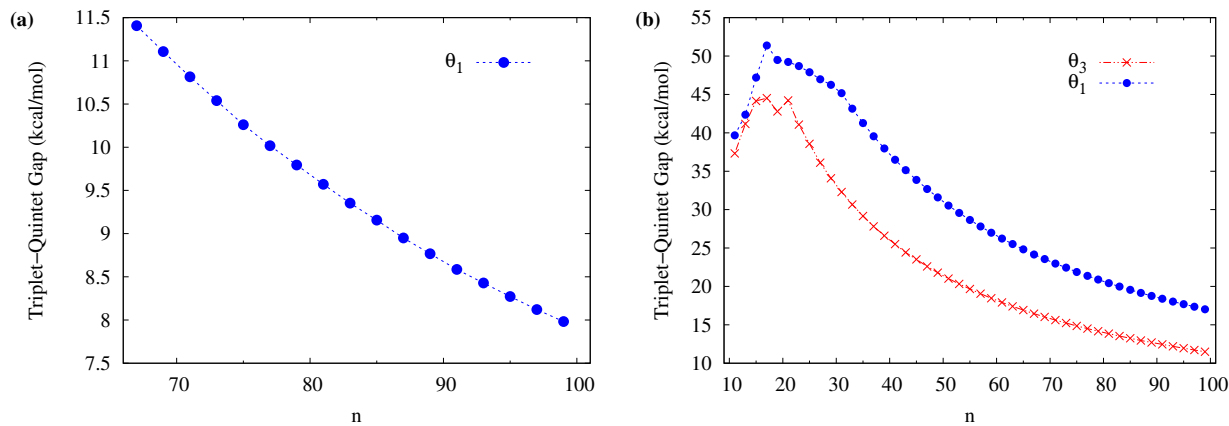

FIG. S3. Triplet-quintet gap of odd-numbered  $c$ -CC[ $n$ ], calculated using spin-unrestricted (a) TAO-LDAh50 with the  $\theta_1$  parametrization for  $n \geq 67$ , and (b) TAO-LDAh100 with the  $\theta_1$  and  $\theta_3$  parametrizations for  $n \geq 11$ . See Table I for the corresponding  $\theta_1$  and  $\theta_3$  values.

## TABLES

TABLE S1. Singlet-triplet gap (in kcal/mol) of  $n$ -acene, calculated using spin-unrestricted TAO-LDA, TAO-LDAh25, TAO-LDAh50, and TAO-LDAh100 with the corresponding  $\theta_1$ ,  $\theta_2$ , and  $\theta_3$  values (see Table I). The  $\theta = 0$  results are obtained with spin-unrestricted KS-LDA, KS-LDAh25, KS-LDAh50, and KS-LDAh100, respectively. The experimental results [1–4] and the results of ACI-DSRG-MRPT2 (denoted as ADMRPT2 for brevity) [5] are taken from the literature for comparison.

| $n$ | TAO-LDA    |            |            |              | TAO-LDAh25 |            |            |              | TAO-LDAh50 |            |            |              | TAO-LDAh100 |            |            |              | ADMRPT2 | Expt. |
|-----|------------|------------|------------|--------------|------------|------------|------------|--------------|------------|------------|------------|--------------|-------------|------------|------------|--------------|---------|-------|
|     | $\theta_3$ | $\theta_2$ | $\theta_1$ | $\theta = 0$ | $\theta_3$ | $\theta_2$ | $\theta_1$ | $\theta = 0$ | $\theta_3$ | $\theta_2$ | $\theta_1$ | $\theta = 0$ | $\theta_3$  | $\theta_2$ | $\theta_1$ | $\theta = 0$ |         |       |
| 2   | 62.18      | 63.55      | 64.77      | 65.19        | 60.45      | 63.17      | 63.54      | 66.34        | 57.95      | 61.52      | 61.24      | 65.76        | 51.06       | 54.81      | 54.75      | 59.05        | 61.4    | 61.0  |
| 3   | 41.83      | 42.58      | 43.22      | 43.40        | 40.59      | 42.33      | 42.56      | 44.39        | 38.50      | 40.82      | 40.64      | 43.54        | 32.94       | 35.25      | 35.22      | 37.63        | 42.0    | 43.1  |
| 4   | 28.64      | 28.85      | 29.01      | 29.06        | 28.04      | 28.84      | 28.95      | 29.64        | 26.30      | 27.38      | 27.30      | 28.26        | 21.31       | 21.63      | 21.63      | 20.38        | 27.9    | 29.3  |
| 5   | 20.38      | 20.09      | 19.60      | 19.20        | 20.19      | 20.18      | 20.16      | 19.34        | 18.69      | 18.69      | 18.71      | 17.33        | 14.12       | 12.74      | 12.78      | 7.84         | 18.0    | 19.8  |
| 6   | 15.36      | 14.71      | 13.55      | 12.16        | 15.27      | 14.69      | 14.56      | 11.95        | 13.93      | 13.13      | 13.23      | 9.32         | 9.62        | 6.64       | 6.73       | -6.20        | 11.4    |       |
| 7   | 12.28      | 11.49      | 9.91       | 6.98         | 12.12      | 11.21      | 11.02      | 6.52         | 10.87      | 9.59       | 9.74       | 3.34         | 6.78        | 1.58       | 1.73       | 36.69        | 7.7     |       |
| 8   | 10.26      | 9.49       | 7.84       | 3.07         | 9.99       | 8.96       | 8.74       | 2.46         | 8.81       | 7.32       | 7.48       | 12.30        | 4.91        | -3.37      | -3.16      | 37.49        |         |       |
| 9   | 8.83       | 8.14       | 6.66       | 0.99         | 8.46       | 7.43       | 7.21       | 5.07         | 7.35       | 5.79       | 5.97       | 13.47        | 3.65        | -9.25      | -8.98      | 37.20        |         |       |
| 10  | 7.74       | 7.14       | 5.90       | 0.53         | 7.33       | 6.33       | 6.12       | 5.14         | 6.27       | 6.89       | 6.67       | 15.43        | 2.75        | -13.75     | -13.43     | 38.29        |         |       |
| 11  | 6.88       | 6.34       | 5.32       | 0.86         | 6.44       | 5.49       | 5.30       | 5.68         | 5.44       | 6.51       | 6.26       | 18.00        | 2.08        | -20.55     | -20.16     | 37.19        |         |       |
| 12  | 6.19       | 5.69       | 4.82       | 1.59         | 5.74       | 4.83       | 4.65       | 6.56         | 4.80       | 6.36       | 6.05       | 21.05        | 1.61        | -24.75     | -24.31     | 38.48        |         |       |
| 13  | 5.62       | 5.16       | 4.40       | 2.52         | 5.18       | 4.31       | 4.14       | 7.72         | 4.30       | 6.35       | 5.97       | 24.48        | 1.23        | -30.34     | -29.86     | 38.48        |         |       |
| 14  | 5.15       | 4.71       | 3.98       | 3.50         | 4.71       | 3.88       | 3.72       | 9.12         | 3.90       | 6.43       | 5.99       | 28.20        | 0.97        | -35.94     | -35.39     | 38.48        |         |       |
| 15  | 4.75       | 4.34       | 3.65       | 4.34         | 4.33       | 3.53       | 3.37       | 10.72        | 3.57       | 6.60       | 6.08       | 32.14        | 0.75        | -41.54     | -40.93     | 38.47        |         |       |
| 16  | 4.42       | 4.03       | 3.37       | 4.43         | 4.00       | 3.24       | 3.09       | 12.47        | 3.30       | 6.82       | 6.24       | 36.25        | 0.59        | -47.13     | -46.47     | 38.47        |         |       |
| 17  | 4.12       | 3.76       | 3.14       | 3.90         | 3.72       | 2.99       | 2.85       | 14.35        | 3.07       | 7.08       | 6.44       | 40.50        | 0.47        | -52.72     | -52.01     | 38.47        |         |       |
| 18  | 3.87       | 3.53       | 2.94       | 3.01         | 3.48       | 2.78       | 2.65       | 19.82        | 2.88       | 7.38       | 6.67       | 43.67        | 0.38        | -58.29     | -57.52     | 38.46        |         |       |
| 19  | 3.64       | 3.32       | 2.77       | 1.96         | 3.26       | 2.60       | 2.47       | 19.27        | 2.72       | 7.71       | 6.93       | 44.67        | 0.29        | -63.89     | -63.06     | 38.46        |         |       |
| 20  | 3.44       | 3.14       | 2.62       | 1.30         | 3.07       | 2.45       | 2.32       | 19.03        | 2.58       | 8.06       | 7.20       | 46.08        | 0.25        | -69.43     | -68.55     | 38.46        |         |       |
| 21  | 3.26       | 2.97       | 2.49       |              | 2.91       | 2.30       | 2.19       |              | 2.46       | 8.42       | 7.50       |              | 0.19        | -74.99     | -74.06     |              |         |       |
| 22  | 3.10       | 2.83       | 2.37       |              | 2.76       | 2.18       | 2.07       |              | 2.36       | 8.79       | 7.81       |              | 0.17        | -80.57     | -79.57     |              |         |       |
| 23  | 2.96       | 2.69       | 2.25       |              | 2.62       | 2.07       | 1.96       |              | 2.26       | 9.17       | 8.13       |              | 0.14        | -86.13     | -85.06     |              |         |       |
| 24  | 2.82       | 2.57       | 2.15       |              | 2.50       | 1.96       | 1.86       |              | 2.19       | 9.57       | 8.45       |              | 0.12        | -91.66     | -90.57     |              |         |       |
| 25  | 2.70       | 2.46       | 2.06       |              | 2.38       | 1.88       | 1.78       |              | 2.12       | 9.96       | 8.79       |              | 0.07        | -97.23     | -96.04     |              |         |       |
| 26  | 2.59       | 2.36       | 1.98       |              | 2.28       | 1.79       | 1.70       |              | 2.06       | 10.38      | 9.13       |              | 0.07        | -102.72    | -101.51    |              |         |       |
| 27  | 2.49       | 2.26       | 1.90       |              | 2.19       | 1.72       | 1.62       |              | 2.00       | 10.76      | 9.47       |              | 0.07        | -108.30    | -107.03    |              |         |       |
| 28  | 2.39       | 2.18       | 1.83       |              | 2.11       | 1.64       | 1.56       |              | 1.96       | 11.19      | 9.82       |              | 0.06        | -113.85    | -112.52    |              |         |       |
| 29  | 2.31       | 2.10       | 1.76       |              | 2.03       | 1.58       | 1.50       |              | 1.90       | 11.61      | 10.18      |              | 0.06        | -119.36    | -117.95    |              |         |       |
| 30  | 2.22       | 2.02       | 1.70       |              | 1.95       | 1.52       | 1.44       |              | 1.86       | 12.03      | 10.54      |              | 0.04        | -124.91    | -123.46    |              |         |       |

TABLE S2. Singlet-triplet gap (in kcal/mol) of  $c$ -CC[ $n$ ], calculated using spin-unrestricted TAO-LDA, TAO-LDAh25, TAO-LDAh50, and TAO-LDAh100 with the corresponding  $\theta_1$  and  $\theta_3$  values (see Table I).

| $n$ | TAO-LDA    |            | TAO-LDAh25 |            | TAO-LDAh50 |            | TAO-LDAh100 |            |
|-----|------------|------------|------------|------------|------------|------------|-------------|------------|
|     | $\theta_3$ | $\theta_1$ | $\theta_3$ | $\theta_1$ | $\theta_3$ | $\theta_1$ | $\theta_3$  | $\theta_1$ |
| 10  | 51.55      | 62.97      | 49.14      | 43.89      | 49.19      | 43.27      | 54.15       | 33.24      |
| 11  | 15.52      | 16.31      | 18.98      | 11.54      | 12.66      | 10.88      | -0.04       | -6.62      |
| 12  | 12.13      | 14.84      | 13.91      | 15.86      | 11.67      | 11.92      | 16.92       | 22.94      |
| 13  | 10.19      | 6.63       | 13.06      | 11.07      | 14.77      | 13.72      | -4.76       | -15.51     |
| 14  | 33.09      | 44.08      | 28.25      | 35.58      | 26.41      | 33.16      | 17.17       | 23.46      |
| 15  | 10.79      | 8.82       | 12.70      | 12.38      | 13.88      | 7.07       | -7.34       | -17.81     |
| 16  | 7.57       | 6.67       | 8.86       | 8.15       | 10.73      | 11.77      | 8.49        | 15.81      |
| 17  | 10.40      | 6.89       | 12.18      | 10.96      | 12.80      | 12.44      | -10.09      | -22.91     |
| 18  | 22.28      | 31.84      | 18.22      | 22.82      | 16.65      | 20.22      | 10.51       | 18.45      |

|    |       |       |       |       |       |       |        |        |
|----|-------|-------|-------|-------|-------|-------|--------|--------|
| 19 | 10.11 | 7.55  | 11.05 | 10.55 | 11.34 | 11.80 | -13.10 | -26.67 |
| 20 | 7.49  | 5.27  | 8.71  | 7.20  | 9.76  | 13.07 | 18.96  | 30.31  |
| 21 | 10.15 | 7.36  | 10.95 | 10.45 | 11.05 | 5.79  | -15.17 | -30.33 |
| 22 | 16.04 | 23.75 | 13.27 | 16.01 | 12.25 | 13.80 | 6.14   | 13.31  |
| 23 | 7.71  | 5.63  | 8.35  | 7.96  | 8.07  | 4.37  | -17.60 | -33.75 |
| 24 | 5.60  | 3.13  | 6.92  | 5.64  | 7.72  | 11.27 | 16.45  | 28.08  |
| 25 | 7.67  | 5.69  | 8.16  | 7.99  | 7.97  | 4.36  | -19.54 | -36.88 |
| 26 | 10.62 | 16.45 | 9.11  | 10.68 | 8.63  | 11.63 | 1.92   | 7.62   |
| 27 | 6.91  | 5.52  | 7.28  | 7.12  | 7.11  | 3.40  | -21.49 | -39.95 |
| 28 | 5.95  | 3.81  | 6.89  | 6.09  | 7.36  | 11.48 | 14.99  | 25.70  |
| 29 | 6.84  | 5.56  | 7.05  | 7.04  | 6.89  | 3.26  | -23.46 | -42.90 |
| 30 | 8.28  | 12.58 | 7.42  | 8.33  | 7.20  | 10.34 | 14.14  | 24.64  |
| 31 | 6.18  | 5.30  | 6.41  | 6.35  | 6.31  | 2.64  | -25.47 | -45.72 |
| 32 | 5.28  | 3.39  | 5.98  | 5.45  | 6.30  | 9.65  | 13.31  | 23.51  |
| 33 | 6.08  | 5.33  | 6.19  | 6.22  | 6.07  | 2.45  | -27.12 | -48.51 |
| 34 | 6.79  | 9.88  | 6.31  | 6.85  | 6.24  | 9.44  | 12.74  | 22.59  |
| 35 | 5.56  | 5.02  | 5.72  | 5.69  | 5.66  | 2.03  | -29.08 | -51.25 |
| 36 | 5.12  | 3.59  | 5.57  | 5.26  | 5.75  | 8.99  | 12.13  | 21.57  |
| 37 | 5.44  | 5.03  | 5.51  | 5.55  | 5.42  | 1.84  | -31.01 | -53.95 |
| 38 | 5.79  | 7.98  | 5.53  | 5.85  | 5.54  | 8.75  | 11.58  | 20.71  |
| 39 | 5.03  | 4.71  | 5.16  | 5.15  | 5.28  | 1.54  | -32.96 | -56.64 |
| 40 | 4.68  | 3.46  | 4.99  | 4.81  | 5.17  | 8.42  | 11.02  | 19.92  |
| 41 | 4.92  | 4.71  | 4.96  | 5.01  | 5.04  | 1.37  | -34.94 | -59.30 |
| 42 | 5.08  | 6.61  | 4.95  | 5.14  | 5.00  | 8.18  | 10.57  | 19.16  |
| 43 | 4.59  | 4.40  | 4.70  | 4.70  | 4.79  | 1.15  | -36.83 | -61.95 |
| 44 | 4.44  | 3.52  | 4.64  | 4.55  | 4.76  | 7.91  | 10.16  | 18.46  |
| 45 | 4.47  | 4.38  | 4.52  | 4.55  | 4.47  | 1.00  | -38.81 | -64.60 |
| 46 | 4.55  | 5.62  | 4.49  | 4.61  | 4.57  | 7.69  | 9.75   | 17.78  |
| 47 | 4.22  | 4.10  | 4.31  | 4.31  | 4.28  | 0.84  | -40.71 | -67.25 |
| 48 | 4.13  | 3.44  | 4.26  | 4.22  | 4.37  | 7.48  | 9.39   | 17.16  |
| 49 | 4.10  | 4.07  | 4.15  | 4.18  | 4.21  | 0.71  | -42.64 | -69.88 |
| 50 | 4.13  | 4.87  | 4.12  | 4.19  | 4.21  | 7.29  | 9.03   | 16.56  |
| 51 | 3.90  | 3.82  | 3.97  | 3.98  | 3.95  | 0.58  | -44.57 | -72.50 |
| 52 | 3.89  | 3.39  | 3.98  | 3.97  | 4.11  | 7.10  | 8.74   | 16.03  |
| 53 | 3.78  | 3.79  | 3.83  | 3.86  | 3.89  | 0.55  | -46.52 | -75.13 |
| 54 | 3.79  | 4.31  | 3.80  | 3.85  | 3.91  | 6.94  | 8.41   | 15.52  |
| 55 | 3.62  | 3.57  | 3.69  | 3.70  | 3.67  | 0.43  | -48.45 | -77.77 |
| 56 | 3.58  | 3.22  | 3.66  | 3.66  | 3.80  | 6.78  | 8.14   | 15.03  |
| 57 | 3.52  | 3.53  | 3.56  | 3.59  | 3.61  | 0.34  | -50.40 | -80.40 |
| 58 | 3.52  | 3.88  | 3.54  | 3.57  | 3.65  | 6.64  | 7.88   | 14.57  |
| 59 | 3.38  | 3.35  | 3.44  | 3.45  | 3.42  | 0.17  | -52.33 | -83.01 |
| 60 | 3.39  | 3.14  | 3.48  | 3.48  | 3.59  | 6.49  | 7.64   | 14.14  |
| 61 | 3.28  | 3.31  | 3.33  | 3.35  | 3.37  | 0.09  | -54.27 | -85.65 |
| 62 | 3.27  | 3.53  | 3.30  | 3.33  | 3.42  | 6.38  | 7.39   | 13.74  |
| 63 | 3.17  | 3.15  | 3.22  | 3.24  | 3.26  | 0.08  | -56.21 | -82.49 |
| 64 | 3.11  | 2.93  | 3.17  | 3.18  | 3.34  | 6.26  | 7.17   | 13.35  |
| 65 | 3.08  | 3.10  | 3.13  | 3.14  | 3.16  | 0.00  | -58.14 | -85.11 |
| 66 | 3.10  | 3.28  | 3.13  | 3.16  | 3.25  | 6.14  | 6.98   | 12.98  |
| 67 | 2.98  | 2.97  | 3.03  | 3.05  | 3.01  | -0.12 | -60.07 | -87.73 |
| 68 | 2.99  | 2.87  | 3.03  | 3.05  | 3.17  | 6.06  | 6.78   | 12.63  |
| 69 | 2.90  | 2.92  | 2.95  | 2.96  | 2.97  | -0.19 | -62.01 | -90.38 |
| 70 | 2.95  | 3.08  | 2.97  | 2.99  | 3.10  | 5.93  | 6.60   | 12.30  |

|     |      |      |      |      |      |       |        |         |
|-----|------|------|------|------|------|-------|--------|---------|
| 71  | 2.82 | 2.81 | 2.87 | 2.88 | 2.85 | -0.24 | -63.94 | -93.03  |
| 72  | 2.77 | 2.69 | 2.82 | 2.83 | 2.98 | 5.84  | 6.41   | 11.99   |
| 73  | 2.74 | 2.76 | 2.78 | 2.80 | 2.81 | -0.29 | -65.88 | -95.67  |
| 74  | 2.70 | 2.80 | 2.77 | 2.78 | 2.90 | 5.77  | 6.24   | 11.69   |
| 75  | 2.67 | 2.66 | 2.73 | 2.74 | 2.73 | -0.32 | -67.81 | -98.29  |
| 76  | 2.63 | 2.57 | 2.71 | 2.72 | 2.89 | 5.66  | 6.08   | 11.40   |
| 77  | 2.60 | 2.61 | 2.64 | 2.65 | 2.65 | -0.37 | -69.75 | -100.94 |
| 78  | 2.57 | 2.63 | 2.62 | 2.62 | 2.76 | 5.58  | 5.93   | 11.13   |
| 79  | 2.53 | 2.53 | 2.58 | 2.59 | 2.56 | -0.43 | -71.68 | -103.58 |
| 80  | 2.50 | 2.46 | 2.56 | 2.55 | 2.71 | 5.50  | 5.79   | 10.87   |
| 81  | 2.47 | 2.48 | 2.51 | 2.52 | 2.54 | -0.47 | -73.63 | -106.23 |
| 82  | 2.44 | 2.49 | 2.48 | 2.49 | 2.64 | 5.44  | 5.65   | 10.62   |
| 83  | 2.41 | 2.41 | 2.44 | 2.46 | 2.44 | -0.49 | -75.56 | -108.87 |
| 84  | 2.38 | 2.35 | 2.42 | 2.43 | 2.65 | 5.38  | 5.53   | 10.38   |
| 85  | 2.35 | 2.37 | 2.39 | 2.40 | 2.41 | -0.54 | -77.51 | -111.51 |
| 86  | 2.33 | 2.36 | 2.36 | 2.38 | 2.56 | 5.32  | 5.40   | 10.15   |
| 87  | 2.30 | 2.30 | 2.33 | 2.35 | 2.33 | -0.56 | -79.42 | -114.14 |
| 88  | 2.27 | 2.26 | 2.31 | 2.32 | 2.54 | 5.24  | 5.28   | 9.94    |
| 89  | 2.25 | 2.26 | 2.28 | 2.30 | 2.29 | -0.58 | -81.38 | -116.81 |
| 90  | 2.22 | 2.25 | 2.26 | 2.27 | 2.45 | 5.18  | 5.16   | 9.73    |
| 91  | 2.20 | 2.20 | 2.23 | 2.24 | 2.23 | -0.61 | -83.30 | -119.44 |
| 92  | 2.17 | 2.16 | 2.21 | 2.22 | 2.41 | 5.12  | 5.06   | 9.53    |
| 93  | 2.15 | 2.16 | 2.19 | 2.20 | 2.19 | -0.65 | -85.25 | -122.09 |
| 94  | 2.13 | 2.15 | 2.16 | 2.17 | 2.32 | 5.08  | 4.95   | 9.34    |
| 95  | 2.11 | 2.11 | 2.14 | 2.15 | 2.15 | -0.68 | -87.20 | -124.74 |
| 96  | 2.08 | 2.08 | 2.12 | 2.13 | 2.30 | 5.04  | 4.85   | 9.15    |
| 97  | 2.06 | 2.07 | 2.10 | 2.11 | 2.10 | -0.71 | -89.13 | -127.39 |
| 98  | 2.04 | 2.06 | 2.08 | 2.09 | 2.24 | 5.00  | 4.73   | 8.97    |
| 99  | 2.02 | 2.02 | 2.05 | 2.06 | 2.06 | -0.73 | -91.06 | -130.02 |
| 100 | 2.00 | 2.00 | 2.03 | 2.04 | 2.28 | 4.95  | 4.65   | 8.80    |

TABLE S3. Bond length alternation (in Å) of singlet ground-state even-numbered  $c$ -CC[ $n$ ], calculated using spin-restricted TAO-LDA, TAO-LDAh25, TAO-LDAh50, and TAO-LDAh100 with the corresponding  $\theta_1$  and  $\theta_3$  values (see Table I). The results of CCSD (with the cc-pVDZ basis set, for  $n = 10, 14, 18,$  and  $22$ ) [6] and CAS-SCF (for  $n = 18$ ) [7] are taken from the literature for comparison.

| $n$ | TAO-LDA    |            | TAO-LDAh25 |            | TAO-LDAh50 |            | TAO-LDAh100 |            | CCSD   | CAS-SCF |
|-----|------------|------------|------------|------------|------------|------------|-------------|------------|--------|---------|
|     | $\theta_3$ | $\theta_1$ | $\theta_3$ | $\theta_1$ | $\theta_3$ | $\theta_1$ | $\theta_3$  | $\theta_1$ |        |         |
| 10  | 0.0000     | 0.0000     | 0.0000     | 0.0000     | 0.0000     | 0.0000     | 0.0000      | 0.0000     | 0.0000 |         |
| 12  | 0.0001     | 0.0001     | 0.0002     | 0.0005     | 0.0468     | 0.0818     | 0.0785      | 0.1078     |        |         |
| 14  | 0.0000     | 0.0000     | 0.0000     | 0.0000     | 0.0001     | 0.0001     | 0.0564      | 0.1030     | 0.1325 |         |
| 16  | 0.0000     | 0.0000     | 0.0001     | 0.0003     | 0.0537     | 0.0954     | 0.1170      | 0.1482     |        |         |
| 18  | 0.0000     | 0.0000     | 0.0000     | 0.0000     | 0.0001     | 0.0002     | 0.1142      | 0.1448     | 0.1448 | 0.157   |
| 20  | 0.0000     | 0.0000     | 0.0001     | 0.0006     | 0.0486     | 0.0923     | 0.1193      | 0.1486     |        |         |
| 22  | 0.0001     | 0.0001     | 0.0001     | 0.0000     | 0.0059     | 0.0745     | 0.1176      | 0.1471     | 0.1470 |         |
| 24  | 0.0000     | 0.0000     | 0.0005     | 0.0006     | 0.0391     | 0.0877     | 0.1187      | 0.1479     |        |         |
| 26  | 0.0000     | 0.0000     | 0.0001     | 0.0001     | 0.0133     | 0.0802     | 0.1182      | 0.1475     |        |         |
| 28  | 0.0001     | 0.0000     | 0.0001     | 0.0001     | 0.0333     | 0.0853     | 0.1183      | 0.1479     |        |         |
| 30  | 0.0001     | 0.0000     | 0.0001     | 0.0001     | 0.0244     | 0.0819     | 0.1182      | 0.1476     |        |         |
| 32  | 0.0005     | 0.0005     | 0.0002     | 0.0002     | 0.0307     | 0.0842     | 0.1183      | 0.1476     |        |         |
| 34  | 0.0000     | 0.0000     | 0.0001     | 0.0001     | 0.0269     | 0.0829     | 0.1183      | 0.1476     |        |         |

|     |        |        |        |        |        |        |        |        |
|-----|--------|--------|--------|--------|--------|--------|--------|--------|
| 36  | 0.0000 | 0.0000 | 0.0000 | 0.0000 | 0.0292 | 0.0839 | 0.1182 | 0.1475 |
| 38  | 0.0000 | 0.0000 | 0.0001 | 0.0001 | 0.0279 | 0.0832 | 0.1182 | 0.1475 |
| 40  | 0.0002 | 0.0002 | 0.0001 | 0.0001 | 0.0293 | 0.0837 | 0.1182 | 0.1475 |
| 42  | 0.0000 | 0.0000 | 0.0001 | 0.0001 | 0.0278 | 0.0832 | 0.1182 | 0.1475 |
| 44  | 0.0000 | 0.0000 | 0.0001 | 0.0001 | 0.0284 | 0.0834 | 0.1182 | 0.1476 |
| 46  | 0.0001 | 0.0001 | 0.0002 | 0.0002 | 0.0286 | 0.0831 | 0.1182 | 0.1475 |
| 48  | 0.0001 | 0.0001 | 0.0003 | 0.0003 | 0.0281 | 0.0832 | 0.1182 | 0.1476 |
| 50  | 0.0000 | 0.0000 | 0.0001 | 0.0001 | 0.0279 | 0.0832 | 0.1182 | 0.1476 |
| 52  | 0.0000 | 0.0000 | 0.0001 | 0.0000 | 0.0280 | 0.0833 | 0.1182 | 0.1476 |
| 54  | 0.0000 | 0.0000 | 0.0001 | 0.0001 | 0.0283 | 0.0833 | 0.1182 | 0.1476 |
| 56  | 0.0000 | 0.0000 | 0.0002 | 0.0002 | 0.0283 | 0.0833 | 0.1183 | 0.1476 |
| 58  | 0.0000 | 0.0000 | 0.0001 | 0.0001 | 0.0274 | 0.0833 | 0.1182 | 0.1476 |
| 60  | 0.0000 | 0.0000 | 0.0001 | 0.0001 | 0.0280 | 0.0833 | 0.1182 | 0.1477 |
| 62  | 0.0000 | 0.0000 | 0.0000 | 0.0000 | 0.0280 | 0.0833 | 0.1182 | 0.1477 |
| 64  | 0.0001 | 0.0001 | 0.0001 | 0.0001 | 0.0277 | 0.0833 | 0.1182 | 0.1476 |
| 66  | 0.0000 | 0.0000 | 0.0000 | 0.0000 | 0.0276 | 0.0833 | 0.1184 | 0.1477 |
| 68  | 0.0000 | 0.0000 | 0.0000 | 0.0001 | 0.0281 | 0.0834 | 0.1183 | 0.1476 |
| 70  | 0.0001 | 0.0001 | 0.0000 | 0.0000 | 0.0281 | 0.0833 | 0.1182 | 0.1476 |
| 72  | 0.0000 | 0.0000 | 0.0000 | 0.0001 | 0.0274 | 0.0833 | 0.1182 | 0.1477 |
| 74  | 0.0000 | 0.0000 | 0.0000 | 0.0002 | 0.0276 | 0.0832 | 0.1183 | 0.1476 |
| 76  | 0.0000 | 0.0000 | 0.0000 | 0.0000 | 0.0278 | 0.0833 | 0.1183 | 0.1477 |
| 78  | 0.0000 | 0.0000 | 0.0000 | 0.0000 | 0.0266 | 0.0833 | 0.1183 | 0.1477 |
| 80  | 0.0000 | 0.0000 | 0.0000 | 0.0000 | 0.0279 | 0.0833 | 0.1183 | 0.1477 |
| 82  | 0.0000 | 0.0000 | 0.0000 | 0.0000 | 0.0280 | 0.0834 | 0.1183 | 0.1477 |
| 84  | 0.0000 | 0.0000 | 0.0002 | 0.0002 | 0.0282 | 0.0833 | 0.1183 | 0.1477 |
| 86  | 0.0000 | 0.0000 | 0.0000 | 0.0000 | 0.0277 | 0.0834 | 0.1184 | 0.1477 |
| 88  | 0.0000 | 0.0000 | 0.0000 | 0.0000 | 0.0281 | 0.0833 | 0.1183 | 0.1477 |
| 90  | 0.0000 | 0.0000 | 0.0000 | 0.0000 | 0.0287 | 0.0834 | 0.1183 | 0.1477 |
| 92  | 0.0001 | 0.0001 | 0.0001 | 0.0001 | 0.0287 | 0.0833 | 0.1184 | 0.1477 |
| 94  | 0.0000 | 0.0000 | 0.0000 | 0.0000 | 0.0288 | 0.0834 | 0.1183 | 0.1477 |
| 96  | 0.0000 | 0.0000 | 0.0000 | 0.0000 | 0.0280 | 0.0833 | 0.1183 | 0.1477 |
| 98  | 0.0000 | 0.0000 | 0.0000 | 0.0000 | 0.0281 | 0.0833 | 0.1184 | 0.1477 |
| 100 | 0.0000 | 0.0000 | 0.0000 | 0.0000 | 0.0280 | 0.0833 | 0.1184 | 0.1477 |
